# Supplementary material
Source: PubMed Central journal article supplement (PMC3641088)

Naltrexone, Opiate, Cocaine, and Opiate/Cocaine Positive Urine Samples Collected During Monthly Visits.

Naltrexone adherence and opiate and cocaine urinalysis results across monthly urine samples. Within each panel, rows of data represent the results for individual participants. The sample to the left of the vertical black line on the horizontal axis was collected prior to random assignment (Rnd) when all participants were required to take oral naltrexone to enter the workplace. Black squares indicate urine samples negative for both opiates and cocaine; orange squares indicate opiate-positive urine samples; white squares with crosses indicate cocaine-positive urine samples; orange squares with crosses indicate samples positive for both opiates and cocaine. Empty sections indicate missing samples. Shaded portions show when participants were protected by naltrexone (i.e., had a naltrexone-positive urine sample). Within each panel, participants are arranged from top to bottom from those with the most to least naltrexone adherence, most to least opiate negative samples, and then most to least cocaine negative samples.

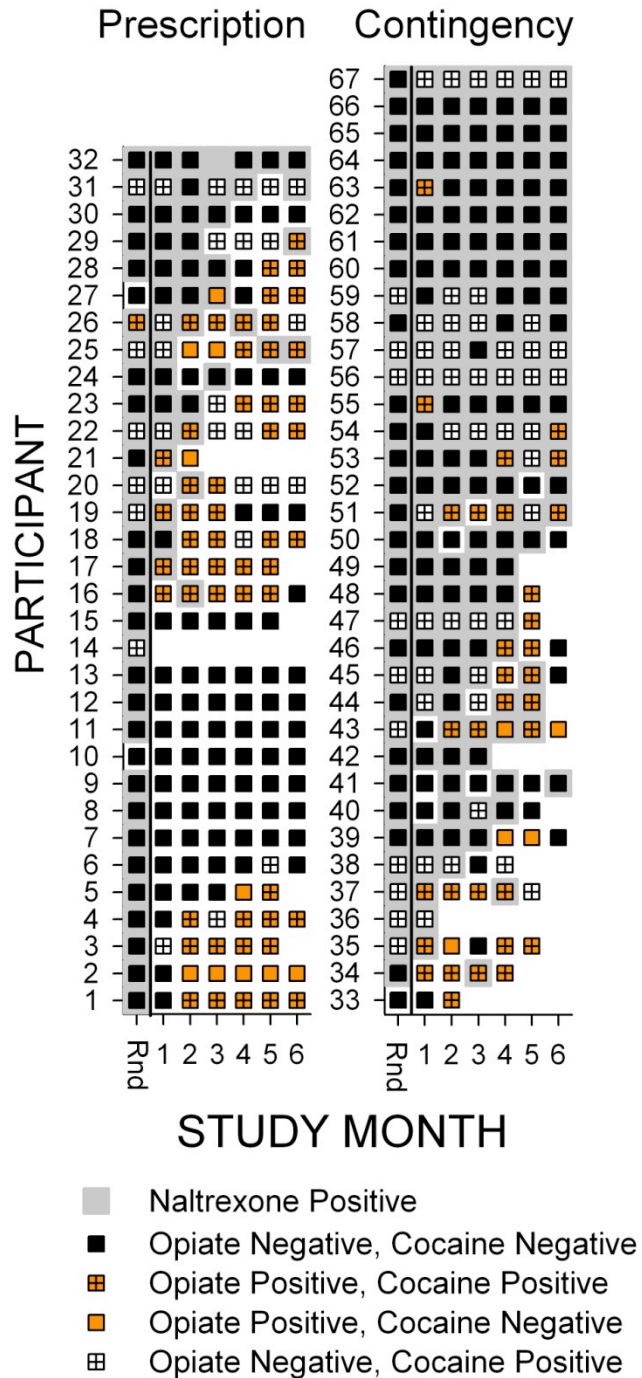

Supplement: NIHMS453494-supplement-1.pdf [file NIHMS453494-supplement-1.pdf]
